# Supplementary material for: Recent Progress in Electrochemical Immunosensors
Source: MDPI journal article supplement (doi:10.3390/bios11100360), 2021-09-29
Supplement: s1 [file s1]

# Recent Progress in Electrochemical Immunosensors

Jeeyoung Kim <sup>1,2,3</sup> and Min Park <sup>1,2,3,\*</sup>

<sup>1</sup> Major in Materials Science and Engineering, Hallym University, Chuncheon 24252, Gangwon-do, Korea; jyoung@hallym.ac.kr

<sup>2</sup> Cooperative Course of Nano-Medical Device Engineering, Hallym University, Chuncheon 24252, Gangwon-do, Korea

<sup>3</sup> Integrative Materials Research Institute, Hallym University, Chuncheon 24252, Gangwon-do, Korea

\* Correspondence: minpark@hallym.ac.kr

**Table S1.** Abbreviations used in this work.

| Abbreviation | Full name                           | Abbreviation                    | Full name                                                    |
|--------------|-------------------------------------|---------------------------------|--------------------------------------------------------------|
| EIS          | electrochemiluminescent             | CMOS                            | complementary metal oxide semiconductor                      |
| LSV          | linear sweep voltammetry            | DPV                             | differential pulse voltammetry                               |
| SWV          | square wave voltammetry             | CV                              | cyclic voltammetry                                           |
| CRP          | C-reactive protein                  | GO                              | graphene oxide                                               |
| LOQ          | limit of quantification             | CysC                            | cystatin C                                                   |
| AF           | aminoferrocene                      | PEI                             | polyethyleneimine                                            |
| LOD          | limit of detection                  | AuNP                            | gold nanoparticle                                            |
| PSA          | prostate-specific antigen           | HP5                             | hydroxyl pillar arene                                        |
| CS           | chitosan                            | HRP                             | horseradish peroxidase                                       |
| PANI         | polyaniline                         | PDA                             | Polydopamine                                                 |
| NSE          | neuron-specific enolase             | PPD                             | poly para-phenylenediamine                                   |
| CA15-3       | carbohydrate antigen 15-3           | NMP22                           | nuclear matrix protein 22                                    |
| MOF          | metal organic framework             | PtNP                            | platinum nanoparticle                                        |
| CNT          | carbon nanotube                     | MWCNT                           | multi-walled carbon nanotube                                 |
| PTH          | parathyroid hormone                 | HER2                            | epidermal growth factor receptor 2                           |
| APTMS        | 3-aminopropyltrimethoxysilane       | EDC                             | N-(3-dimethylaminopropyl)-N'-ethylcarbodiimide hydrochloride |
| NHS          | N-hydroxysuccinimide                | HSP70                           | heat shock protein 70                                        |
| ALP          | alkaline phosphatase                | MMP-9                           | matrix metalloproteinase-9                                   |
| Apo-A4       | apolipoprotein-A4                   | MPT64                           | <i>Mycobacterium tuberculosis</i> protein 64                 |
| TMB          | 3,3'-5,5'-tetramethylbenzidine      | HBsAg                           | hepatitis B surface antigen                                  |
| N-GQD        | nitrogen-doped graphene quantum dot | CEA                             | carcinoembryonic antigen                                     |
| AFP          | alpha-fetoprotein                   | AgNP                            | silver nanoparticle                                          |
| rGO          | reduced graphene oxide              | g-C <sub>3</sub> N <sub>4</sub> | graphitic carbon nitride nanosheets                          |
| AuNR         | gold nanorod                        | HE4Ag                           | human epididymis specific protein 4 antigen                  |
| pPPA         | poly(pyrrolepropionic) acid         | EV71                            | human enterovirus 71                                         |
| SAM          | self-assembly monolayers            | PAMAM                           | poly(amidoamine)                                             |
| EIS          | impedance spectroscopy              | PSS                             | poly-(styrenesulfonate)                                      |
| BSA          | bovine serum albumin                | NS1                             | non-structural 1                                             |
| IL           | interleukin                         | SPy                             | pyrrole-silane                                               |
| PPy          | polypyrrole                         | ITO                             | indium tin oxide                                             |
| PHA          | phosphonohexanoic acid              | PGMA                            | poly(glycidyl methacrylate)                                  |
| CB           | carbon black                        | SARS-CoV-2                      | severe acute respiratory syndrome coronavirus 2              |
| CCR4         | C-C motif chemokine receptor 4      | cTnI                            | cardiac troponin I                                           |

---

|        |                                |      |                                        |
|--------|--------------------------------|------|----------------------------------------|
| QD     | quantum dot                    | PDDA | poly(diallyldimethylammonium chloride) |
| RU     | tris(bipyridine) ruthenium(II) | ABEI | N-(aminobutyl)-N-(ethylisoluminol)     |
| Col IV | collagen type IV               | PFO  | poly(9,9-dioctylfluorenyl-2,7-diyl)    |
| KIM-1  | kidney injury molecule-1       | LDL  | low-density lipoprotein                |
| HE4    | human epididymis protein 4     | 5hmC | 5-hydroxymethylcytosine                |
| PICA   | poly(indole-6-carboxylic acid) | scFv | single chain variable fragment         |

---
